1 Altered protein quality control contributes to noise-induced hearing loss

2

3 Nopporn Jongkamonwiwat<sup>a,1</sup>, Ann C. Y. Wong<sup>b,c</sup>, Miguel A Ramirez<sup>a</sup>, Kwang Pak<sup>b</sup>, Yi-Zhi  
4 Wang<sup>a</sup>, Allen F. Ryan<sup>b</sup>, Jeffrey N. Savas<sup>a,2</sup>

5

6 <sup>a</sup>Department of Neurology, Feinberg School of Medicine, Northwestern University, Chicago,  
7 IL

8 <sup>b</sup>Departments of Surgery and Neuroscience, University of California San Diego and  
9 Veterans Administration Medical Center, La Jolla, CA

10 <sup>c</sup>Translational Neuroscience Facility, Department of Physiology, NSW Australia, Sydney,  
11 Australia

12 <sup>1</sup> present address: Department of Anatomy, Faculty of Science, Mahidol University,  
13 Thailand.

14 <sup>2</sup> correspondence: [Jeffrey.savas@northwestern.edu](mailto:Jeffrey.savas@northwestern.edu)

## 15 **Abstract**

16 Exposure to damaging levels of noise is the most common cause of hearing loss and  
17 impairs high frequency hearing in more than 15 % of adult Americans. Using mice exposed  
18 to increasing levels of noise in combination with quantitative proteomics, we tested how  
19 noise insults remodel the cochlear proteome both acutely and after a two-week recovery  
20 period. We used ABR & DPOAE recordings to define the intensity of noise exposure  
21 necessary to produce temporary or permanent threshold shifts (TTS, PTS) in young adult  
22 mice and found noise at 94 and 105 dB SPL levels for 30 minutes elicits TTS and PTS,  
23 respectively. We quantified thousands of proteins and found that noise insults cause a rapid  
24 increase rather than a decrease in the levels of many proteins involved with protein  
25 homeostasis, myelin, cytoskeletal structures, and cell junctions such as the synapse. The  
26 vast majority of proteins with increased levels immediately after noise exposure showed  
27 normal levels after two weeks of recovery. However, several proteins involved in oxidative  
28 stress and neuroprotection had significantly increased levels only after the recovery period  
29 suggesting they play in important role in regeneration. Interestingly, a small panel of  
30 mitochondrial proteins were significantly altered only in PTS conditions suggesting potential  
31 discrete protein mechanisms. Our discovery-based proteomic analysis extends the recent  
32 description of noise-induced cochlear synaptopathy and shows that noise insults drive a  
33 robust proteostasis response. These data provide a new understanding of noise sensitive

34 proteins and may inform the development of effective preventative strategies or therapies  
35 for NIHL.

36

### 37 **Introduction**

38 Noise-induced hearing loss (NIHL) is a major health problem affecting hundreds of  
39 millions of people. Exposure to damaging levels of noise occurs through occupational,  
40 residential, and recreational activities (1, 2). The major cellular substrates of NIHL are the  
41 mechanoreceptive cochlear sensory epithelial hair cells (HCs) within the organ of Corti and  
42 their associated auditory afferent fibers (ANF). Intense noise at 115-125 dB SPL causes a  
43 direct mechanical destruction of HCs in part by damaging their mechano-sensory  
44 stereociliary bundles and physically impairing their ability to transduce auditory information  
45 (3, 4). Alternatively, lower levels of injurious noise at 85 - 115 dB SPL induces metabolic  
46 changes that damage HCs and ANFs. This is because constant stimulation of the auditory  
47 system places excess metabolic stress leading to an increase in oxygen consumption, free  
48 radical production, and excitotoxicity (4-6).

49 Noise-induced damage is categorized based on the duration of hearing impairment.  
50 Recovery of normal hearing after acoustic trauma depends on the intensity and duration of  
51 the exposure (7). Hearing thresholds elevate immediately after noise exposure and may fully  
52 or partially recover after days or weeks. Moderate noise exposure results in a transient  
53 attenuation of hearing sensitivity, referred to as a TTS, which decreases auditory sensitivity  
54 for a period of days to weeks. PTS are caused by more severe insults and result in  
55 irreversible sensorineural hearing loss. In laboratory settings TTS conditions recover after  
56 two to four weeks, and any residual threshold elevation after this period are considered  
57 permanent (7, 8). The molecular mechanisms and protein networks responsible for threshold  
58 elevation and the recovery process observed in TTS are poorly understood.

59 Intense noise exposure alters synaptic connections between HCs, and ANFs or  
60 olivocochlear efferent nerve fibers (9, 10). ANF terminals dramatically swell immediately  
61 after noxious noise exposures as a result of glutamatergic excitotoxicity, which can result in

62 decoupling of the pre- and postsynaptic membranes (11). Interestingly, swelling subsides  
63 within a few days of exposure and ANFs morphologically recover or regenerate on a similar  
64 timeline as auditory thresholds (12). The recovery of the terminals with only minimal ANF  
65 death suggests that some neural damage is reversible via regeneration mechanisms in  
66 purely TTS conditions (10, 13). However, in TTS conditions, up to half of inner HC ribbon  
67 synapses are permanently lost (10, 14). In PTS conditions, the pathological consequences  
68 of excessive noise are more severe in nature. This ranges from outer and inner HC death  
69 with secondary degeneration of ANFs, to mechanical disruption of the HC mechano-  
70 transduction machinery (15). Metabolic changes induced by HC overexposure and  
71 excitotoxicity can trigger metabolic decompensation resulting in the swelling of nuclei and  
72 mitochondria, as well as cytoplasmic vesiculation (16). Activation of cell stress pathways  
73 may lead to apoptosis (17). Acute exposures to noise above 130 dB SPL can cause  
74 mechanical destruction leading to the disruption of cell junctions and cell rupture, resulting in  
75 the mixing of endolymph and perilymph and potassium toxicity to nearby cells (18, 19).

76         While there is considerable data regarding the morphological effects of noise  
77 damage, we have only a limited molecular understanding of TTS and PTS, and know very  
78 little about the protein networks involved in mitigating temporary vs permanent damages in  
79 the cochlea. A deep biological understanding of the protein alterations responsible for TTS  
80 and PTS, and the recovery mechanisms in TTS conditions may provide new insight towards  
81 the therapeutic protection and treatment of NIHL. Mass spectrometry (MS)-based  
82 proteomics provides an opportunity to investigate complex biological phenomena by  
83 identifying and quantitating thousands of proteins. Previous proteomic studies of the auditory  
84 system have provided draft HC and organ of Corti proteomes, and identified protein  
85 substrates of chemically induced hearing loss (20-24). Transcriptomic analysis has also  
86 been informative and revealed a panel of genes acutely regulated in response to very high  
87 noise levels (25). To generate a global analysis of noise effects on cochlear proteins, we  
88 applied multiple quantitative proteomic strategies to characterize acute proteome remodeling  
89 in PTS and TTS conditions. We found direct and compensatory changes in the levels of

90 discrete proteins. The level of hundreds of non-synaptic proteins are acutely affected by  
91 noise exposure and, many proteins had increased levels. In particular, noise exposure  
92 triggers a robust increase of many proteostasis proteins including nearly the entire  
93 proteasome and many heat shock chaperones. We used orthogonal proteomic experiments  
94 to validate 2,281 and 1,831 quantified significant altered proteins in PTS and TTS,  
95 respectively. Finally, we performed proteomic measurements two weeks after noise  
96 exposure. These experiments identified a small panel of proteins exclusively elevated at this  
97 post-exposure time point. The hope is that by identifying protein networks with altered levels  
98 after noise exposure we can highlight new targets for future prevention or treatment of NIHL.  
99

## 100 **Significance**

101 Multiple quantitative proteomic strategies have determined how damaging auditory  
102 stimulation alters the cochlear proteome. Our findings show that moderate and high levels of  
103 noise causing temporary and permanent hearing loss drive robust and dose-dependent  
104 proteome remodeling. We identified cochlear proteins involved with protein degradation and  
105 folding with increased levels after noise exposure suggesting that the proteostasis network  
106 plays a key role in NIHL. Defining the changes in the cochlear proteome immediately after  
107 noise exposure and during the recovery period has provided a new understanding of the  
108 protein networks acutely affected by noise and those involved in the recovery process.  
109 Altogether, our findings provide many important protein targets for potential future  
110 therapeutic targeting, to prevention or treat NIHL.

111

## 112 **Results**

### 113 *Hearing loss induced by short-term noise exposure*

114 We set out to identify the protein mechanisms associated with NIHL. To minimize the  
115 contribution of age-associated factors we perform our analysis using young adult FVB mice  
116 (P50-60). We exposed individual mice to 6-18 kHz octave band noise, at 70, 94, 100, and  
117 105 dB SPL intensities for 30 minutes. ABR tone and click, as well as DPOAE hearing

118 measurements were performed before, in addition to 1, 7, and 14 days after noise exposure.  
119 We found that 70 dB SPL exposures represented non-traumatic activation (NTA) of the  
120 cochlea and resulted in only a slight increase in click and tone ABR thresholds one day post  
121 noise exposure (**SI Appendix, Fig.S1A-B and S2A**). DPOAE analysis confirmed that OHC  
122 function also recovered to normal levels after one week (**SI Appendix, Fig.S1C**). Wave I  
123 amplitude, which indicates strength of synaptic transmission primarily between IHCs and  
124 ANFs, was unaffected after 70 dB SPL (**SI Appendix, Fig.S1D**). Acoustic overstimulation at  
125 94 dB SPL had similar recovery profiles after seven or 14 days and we observed a near-  
126 complete recovery of hearing thresholds after two weeks (**SI Appendix, Fig.S1E-H and**  
127 **S2B**). Exposure to 100 dB SPL resulted acutely in highly elevated levels of ABR and  
128 DPOAE thresholds as compared to 94 dB SPL. However, after 7 and 14 days of recovery,  
129 ABR thresholds recovered almost fully to baseline levels (**SI Appendix, Fig. S1I-K and**  
130 **S2C**). Exposure to 100 dB SPL was the lowest exposure level tested to show permanent  
131 reduction in Wave I amplitudes (**SI Appendix, Fig. S1L**). Noise exposure to 105 dB SPL  
132 caused severe elevations in threshold levels by DPOAE and ABR to click and tone stimuli.  
133 Wave I amplitudes were also significantly reduced, and there was minimal recovery of  
134 amplitudes and thresholds after two weeks, indicative of permanent damage (**SI Appendix,**  
135 **Fig. S1M-P and S2D**). In summary, our findings indicate that 30-minute exposures at 70 dB  
136 SPL cause minimal hearing impairments, 94 and 100 dB SPL exposures cause  
137 predominantly TTS, while exposure to 105 dB SPL results in a predominantly PTS response.

138

### 139 *Noise exposure alters the level of many cochlear proteins*

140 To investigate how excess noise affects the cochlear proteome in TTS and PTS  
141 conditions, we developed a quantitative proteomic strategy using <sup>15</sup>N-metabolically “heavy”  
142 labeled mice. The pooled proteins from multiple <sup>15</sup>N cochleae facilitate accurate  
143 quantification of unlabeled proteins from experimental cochleae, by serving as an internal  
144 standard for global proteome quantitation (26). In this way, mice exposed to increasing  
145 levels of noise causing NTA, TTS, and PTS remain <sup>14</sup>N and contain “light” proteins, while

146 unexposed cochleae contain “heavy” proteins. We mixed light and heavy cochlea extracts  
147 1:1, digested the proteins to peptides, and performed multi-dimensional chromatograph  
148 with tandem mass spectrometry (MS/MS)-based proteomic analysis (27). To control for  
149 potential quantification errors, we used a ratio of ratios analysis paradigm (28), and related  
150 each noise exposure condition relative to a group of mice placed in a sound chamber  
151 without acoustic exposure (i.e. 0 dB SPL) (**Fig. 1A**). We first focused our attention on  
152 proteins with Benjamini-Hochberg adjusted  $p$ -values  $< 0.05$  (B.H.  $p$ -value). We performed  
153 regression analysis and determined threshold  $\log_2$  fold differences (TLFD) from six control  
154 mice comparisons that provided the lowest correlation. The threshold levels of  $\log_2$  fold cut  
155 offs were determined at 1.24 and -1.35 for up- and down-regulated fold difference,  
156 respectively (**Fig. 1B**). Using this strategy, we determined the number of significantly  
157 regulated proteins that increased or decreased in a noise level dependent manner. Overall,  
158 many more proteins with increased levels rather than decreased across all levels of noise  
159 exposure for 30 minutes. Specifically, we found 21, 115, 226 proteins with significantly  
160 increased levels in datasets for NTA, TTS, and PTS, respectively (**Fig. 1C, SI Appendix**  
161 **and Table S1**).

162 To visualize global trends in cochlear proteome remodeling after increasing levels of  
163 noise exposure we graphed our results using volcano plots (**Fig. 1D-F**). In total, our  
164 proteomic analysis provided relative quantitation for  $> 2,800$  proteins in each analysis.  
165 Interestingly, a panel of proteins (e.g. Psmc5, Uba2) had a noise-dose-dependent increase  
166 in their levels after auditory stimulation. A smaller number of proteins (e.g. Col9A1) had  
167 noise-dose-dependent decrease in their levels. In total, we identified 668, 1,225 and 1,715  
168 significantly (B.H.  $p$ -value  $< 0.05$ ) altered proteins in all three NTA, TTS, and PTS conditions,  
169 respectively (**Fig. 1G**). Many proteins were significantly altered in multiple conditions and  
170 356 were significantly altered in all three conditions. To investigate proteome remodeling  
171 under less damaging conditions, we performed parallel experiments that limited the duration  
172 of noise exposure to 15 min. We again found more proteins with significantly increased  
173 levels compared to those with decreased levels (**SI Appendix, Fig. S3A-C and Table S2**).

174

175 *Noise-increased proteins identify distinct functional processes*

176 To investigate if the significantly altered proteins in the 30 minute datasets (B.H.  $p$ -  
177 value < 0.05) localize to common cellular components or have shared molecular functions  
178 we performed ontology cell component (GO: CC) and molecular function (GO:MF) within the  
179 PANTHER classification system (29). Proteins altered exclusively in the PTS condition are  
180 associated with the GO:CC terms neuronal projections, synapses, cell junctions, among  
181 other structures (**Fig. 1H**). Proteins significantly altered in both TTS and PTS conditions,  
182 were significantly (Fisher's Exact adjusted FDR < 0.05) enriched for the terms cytoskeleton,  
183 cell projection, endopeptidase, and proteasome. These findings support previous evidence  
184 that excess noise alters cochlear cell junctions and synapses (10). It is important to note that  
185 all GO:CC terms significantly enriched in the NTA dataset (e.g. myelin and cytoskeletal fiber)  
186 were also enriched in the TTS and PTS conditions supporting previous findings that TTS  
187 and PTS conditions do not simply represent states of enhanced stress but rather distinct  
188 biological phenomena (**SI Appendix, Table S3**). Interestingly all of the significantly enriched  
189 GO:MF terms are involved with 'binding', suggesting that noise exposure even at NTA levels  
190 impair many protein-protein interactions (**Fig. 1H, SI Appendix, Table S3**).

191

192 *Protein alterations across noise exposure intensities*

193 To investigate our datasets further, we homed in on the individual proteins  
194 significantly (B.H.  $p$ -value < 0.05) altered in multiple datasets. Overall, the majority of  
195 proteins quantified in more than one condition, had dose dependent increases in abundance  
196 with increasing levels of noise (**SI Appendix, Table S4**). Among these noise sensitive  
197 proteins, 356 were significantly altered in all three levels of noise exposure, and 603 proteins  
198 were significantly altered in both the TTS and PTS datasets. Far fewer proteins were  
199 significantly altered in both the NTA and TTS or NTA and PTS conditions (**Fig. 1G**). Out of  
200 the 398 significant proteins altered in all three conditions, 163 proteins had higher levels in  
201 conditions with more intense levels of noise exposure (i.e. PTS > TTS > NTA) (**Fig. 2A**).

202 Similarly, 315 out of the 582 significantly altered proteins quantified in the TTS and PTS  
203 conditions had higher levels after exposure to more intense noise (PTS > TTS) (**Fig. 2B**).  
204 We also observed a similar pattern of increased protein levels among proteins quantified in  
205 the PTS and NTA groups, 79 out of 125 were increased with higher levels of noise (PTS >  
206 NTA) (**Fig. 2C**). Finally, we found a similar trend for those proteins significantly altered in the  
207 NTA and TTS conditions, 28 out of 53 had higher levels (TTS > NTA). A much smaller panel  
208 of proteins had increased reduced levels after intense noise as well (**SI Appendix, Fig.**  
209 **S3A-B**).

210       Based on our findings that proteasome proteins are significantly enriched in the TTS  
211 and PTS but not NTA datasets based on GO:CC analysis (**Fig. 1H**), we searched for  
212 proteasome subunits in our datasets of proteins measured in all three levels of noise  
213 exposure. Indeed, among those proteins significantly altered in multiple noise exposure  
214 conditions, we identified 22 proteasomal proteins, 35 proteins associated with proteolysis  
215 and 20 protein-folding factors (based on GO:BP) (**Fig. 2**). To investigate the possibility that  
216 the significantly altered proteins physically interact, we subjected the datasets to STRING  
217 analysis. Interestingly, we found additional protein-protein interaction networks and  
218 interacting proteins that were significantly increased across noise exposure level (PTS >  
219 TTS > NTA). The major protein hubs identified were associated with the proteasome and  
220 protein folding (heat shock proteins), suggesting that noise exposure drives a robust  
221 proteostasis response (**Fig. 3A**). Noise may drive a protein expression program to delete or  
222 refold damaged proteins that could impair cellular functions. Heat shock proteins are  
223 involved in various aspects of signal transduction, protein folding, and degradation,  
224 apoptosis, and inflammation (30). Two major protein networks were identified in TTS and  
225 PTS but not NTA conditions, Arp2/3 complex and the Ubiquinol-Cytochrome C reductase  
226 complex (**Fig. 3B**). NADH-Ubiquinone Oxidoreductase (Complex I) was the predominant  
227 protein network exclusively altered in the PTS condition which suggests it may contribute  
228 specifically to PTS (**Fig. 3C**).

229



230 *Confirmation of <sup>15</sup>N-based quantitative proteomic results*

231 To confirm our <sup>15</sup>N-based proteomic measurements we repeated our analysis using  
232 10plex isobaric Tandem mass tags (TMT) which facilitate accurate proteome-wide  
233 quantitation (31, 32). Our experimental design consisted of ten animals in three groups: 105  
234 dB SPL (PTS), 94 dB SPL (TTS), and combined 0 and 70 dB SPL (NTA) (**SI Appendix, Fig.**  
235 **S5A**). Overall, greater than 70% of proteins quantified with the <sup>15</sup>N workflow were measured  
236 with TMT; 2,179 proteins across both TTS analyses, and 2,401 proteins in both PTS  
237 analyses (**SI Appendix, Fig. S5B-C**). Next, we extracted those proteins in both datasets and  
238 compared their levels. In this way, we confirmed protein trends: 757 and 662 up-regulated  
239 proteins, and 553 and 556 down-regulated proteins in TTS and PTS conditions, respectively.  
240 TMT also confirmed many significant proteins: 90 and 70 proteins with increased levels and  
241 201 and 28 proteins with reduced levels in TTS and PTS conditions (**Fig. S5D**). We also  
242 confirmed increased levels of many chaperones in the PTS condition including Bag1, 6,  
243 Cct2, 4, 5, 6a, 7 and Clu (**SI Appendix, Table S5**). A representative panel of noise-sensitive  
244 proteins show consistent trends of both increased- and decreased-levels across the intensity  
245 of noise exposure levels (**SI Appendix, Fig. S5E, Table S6**). The panel of proteins with  
246 increased levels included cytoskeletal proteins (Sptan1, Myo6, Tubb4a), a component of the  
247 autophagy system (Atg3), nucleopore protein (Nup98), and signaling proteins (Hcls1).  
248 Interestingly, Gephyrin (Gphn) levels were significantly increased in the PTS conditions of  
249 both TMT and <sup>14/15</sup>N datasets. Gphn is a scaffolding molecule that anchors inhibitory  
250 neurotransmitter receptors to the postsynaptic cytoskeleton and may reflect an increase in  
251 compensatory inhibitory synaptic transmission. Col1a1 had reduced levels presumably due  
252 to structural deterioration. Overall, this analysis confirmed the global trend of noise-induced  
253 proteome remodeling and many individual protein measurements obtained from the <sup>15</sup>N  
254 quantitative proteomics (**SI Appendix, Fig. S5F**).

255

256 *Long-term effects of noise exposure*

257 We then explored whether cochlear proteome remodeling was present after a two-  
258 week recovery period. Our experimental design consisted of ten animals in three groups 105  
259 (PTS), 94 (TTS), and 70 dB SPL (NTA). Mice were subjected to noise for 30 minutes as  
260 previously performed but rather than quantify their proteomes acutely, they were allowed to  
261 recover for 14 days, and their cochlear proteome was quantified with TMT-based  
262 quantitative proteomics (**Fig. 4A**). More than 76% (n = 1,950) of the proteins measured in  
263 the PTS or TTS datasets with  $^{14}\text{N} / ^{15}\text{N}$  and over 90% (n = 2,340) from the acute TMT  
264 analysis were also measured in the recovery TMT experiment (**Fig. 4B**). We identified a  
265 similar number of proteins with altered levels in PTS and TTS conditions in the acute  $^{14}\text{N} /$   
266  $^{15}\text{N}$  or TMT and recovery analyses (**Fig. 4C**). Comparison of the  $^{14}\text{N} / ^{15}\text{N}$  acute exposure  
267 dataset with the recovery TMT analysis revealed 168 and 109 protein with significantly  
268 increased levels, 153 and 88 proteins with reduced abundances in PTS and TTS conditions,  
269 respectively. Comparisons of the proteins with significantly increased levels between the  
270 TMT acute and recovery analyses revealed 17 and 59 proteins in PTS and TTS conditions,  
271 respectively. In a similar way, we identified 70 and 250 proteins with significantly reduced  
272 levels compared to the PTS and TTS conditions, respectively. Next, we extracted the 114  
273 proteins with significantly altered levels from the acute and recovery TMT analysis. The  
274 protein fold change measured in all biological replicates were calculated and represented in  
275 heat map (**Fig. 4D, SI Appendix, Table S7**). Interestingly, we observed a dramatic change  
276 in the protein abundances acutely and after recovery. Hierarchical clustering found 72 and  
277 42 proteins with acutely increased and decreased levels respectively.

278 Many proteins with increased levels after noise had reduced levels after recovery.  
279 Between the enriched Kyoto Encyclopedia of Genes and Genomes (KEGG) pathways and  
280 Gene Ontology (GO) molecular function associated with this dataset (**SI Appendix, Fig. S3**),  
281 a majority of the acutely altered proteins were associated with metabolism (FDR =  $1.16 \times 10^{-7}$ ),  
282 catalytic activity (FDR =  $2.2 \times 10^{-5}$ ) and oxidoreductase activity (FDR =  $3.02 \times 10^{-6}$ ). More  
283 interestingly, the group of proteins with increased levels after the recovery period are  
284 involved with several biological process such as oxidation-reduction (FDR =  $1.87 \times 10^{-4}$ ),

285 negative regulation of cell death (FDR =  $2.69 \times 10^{-3}$ ), and negative regulation of hydrogen  
286 peroxide-induced cell death (FDR =  $2.84 \times 10^{-3}$ ). Among the significantly altered protein in all  
287 four conditions at both time points were *Gstp1* and *Gstp2* acutely and *Hcls1*, *Park7*, and  
288 *Gatm* after recovery. *Gstp1* and *Gstp2* are involved with detoxification via glutathione  
289 reduction (33). *Hcls1* functions in the positive regulation on cell proliferation based on GO  
290 biological process (34). *Park7* is a redox-sensitive chaperone, a sensor for oxidative stress,  
291 and protects neurons against oxidative stress (35). *Gatm* regulates cellular energy buffering  
292 and transport via creatine synthesis (36). Altogether, we identified a robust long-term  
293 cochlear proteostasis program in response to damaging levels of noise, which emphasizes  
294 protective cellular processes.

295

## 296 **Discussion**

297 Nearly all previous attempts to determine the molecular mechanisms responsible for  
298 NIHL have been candidate-based approaches or have focused on changes at the mRNA  
299 level (37-39). These gene expression studies have provided important information regarding  
300 the underlying mechanisms of NIHL. We measured the level of more than 2,800 proteins in  
301 each noise exposure condition and revealed that the acute cochlear proteomic responses  
302 differ among three levels of noise intensity. Overall, the number of significant proteins  
303 identified increased with the intensity of noise. Although, our exposure levels were not  
304 expected to physically disrupt or damage individual polypeptides, we detected a large  
305 number of cytoskeletal proteins with consistently increased levels across higher noise  
306 intensities. Cytoskeletal proteins enriched in HCs have been widely studied in hearing  
307 research predominantly due to their important functions in HC stereocilia structure,  
308 cytoskeletal networks, and contractility of outer HCs (40-42). Increased levels of these  
309 proteins may suggest moderate to high levels of noise disrupt protein-protein interactions or  
310 drive a rapid reorganization of cytoskeletal protein complexes especially F-actin and myosin  
311 that were previously shown to have prompt responses within 10 min after calcium  
312 deprivation in cochlea (43). However, the degree of structural protein alterations may

313 depend on multiple factors including the level and duration of exposure, for example,  
314 extended noise exposure induces actin depolymerization (44). Tubulin proteins are highly  
315 abundant in neurons and had increased levels after noise exposure. Presumably, due to  
316 ANFs swelling or other structural perturbations (45, 46). We also observed an increase in  
317 the levels of neurofilament proteins, which adds further support to our appreciation of ANFs  
318 as key noise substrates. Additional support for ANFs involvement comes from our GO  
319 analysis that identified several neuronal structures (synapse, neuron projection) especially at  
320 noise levels causing PTS. Interestingly, myelin associated proteins were enriched at all  
321 levels which supports previous reports that noise exposure may cause a loss of Schwann  
322 cells and contribute to permanent auditory deficits in NIHL (47). Septins, are actin and  
323 microtubule associated GTP binding proteins expressed by pillar and Deiter's cells, and also  
324 efferent nerve terminals (48). Septins regulate in dendritic spine dynamics (49, 50), and  
325 collateral branching of axons (51). Sept 2,6,7,8,9 were significantly altered by all three levels  
326 of noise but Sept11 and Sept5, localize to cochlear efferent nerve synaptic vesicles were  
327 only significantly altered in TTS and PTS conditions (48). Septins have never been reported  
328 to be involved with NIHL. Increased levels of many cytoskeletal proteins immediately after  
329 noise exposure may reflect structural impairments or rapid reorganization and turnover.

330 Our observation that nearly the entire proteasome has increased levels after noise  
331 highlights the complex stress response triggered by noise exposure. We exposed mice for  
332 15 or 30 minutes. These time frames are sufficient for rapid protein translation of existing  
333 mRNAs (52). Consistently, we identified many abundant proteins with elevated levels after  
334 noise. These proteins may be prominent in our datasets due to the fact that their mRNAs are  
335 highly abundant and selectively translated as part of the stress response (53). Gene  
336 transcription and posttranscriptional mechanisms could increase protein levels but it is  
337 unlikely since they likely require longer periods. Selective protein degradation by  
338 proteosomes, autophagosomes, and lysosomes are most likely to reduce the levels of  
339 distinct proteins. Extracellular proteins are likely to be degraded by additional proteases (**SI**  
340 **Appendix**).

341 STRING analysis revealed several important protein homeostasis regulatory  
342 networks that increased with higher levels of noise stimulation. For example, a large  
343 collection of proteasomal endopeptidases had increased levels after noise exposure  
344 intensities. As far as we are aware, there is no previous evidence that the proteasome is  
345 involved with NIHL. The proteasome is the major cellular degradation machine of the  
346 ubiquitin-proteasome system (54), is responsible for the bulk degradation of misfolded and  
347 damaged proteins (55), and is essential for cells to withstand and recover from various  
348 environmental stresses (56). Heat shock proteins (HSP) are also major noise sensitive  
349 substrates. Cells in the cochlea express HSPs after noise exposure and play protective roles  
350 (57, 58). Our results support and extend these findings, *Hspa1a* (Hsp72), *Hspa1b* (Hsp70)  
351 and the HSPs *Hsp90aa1* and *Hsp90ab1* had significantly increased levels both in TTS and  
352 PTS conditions. The third group of proteins with significantly increased according to noise  
353 stimulation are proteins that are involved in the mitochondrial electron transport chain (59).  
354 The complex I related protein, NADH: ubiquinone oxidoreductase or NADH dehydrogenase  
355 (*Nduf*) and complex III related protein, ubiquinol-cytochrome C reductase (*Uqcrc*) had  
356 significantly increased levels in PTS and suggests it is a candidate for superoxide  
357 generation.

358 We used two different quantitative MS based methods to investigate changes in  
359 protein levels after TTS and PTS acoustic overexposure. Metabolic stable isotope labelling  
360 provides a very accurate and precise quantitative method both *in vitro* (60) and *in vivo* (61).  
361 Isobaric peptide labeling strategies are also powerful since up to twelve or more samples  
362 can be multiplexed and analyzed in the same MS analysis run (62). We used the TMT  
363 isobaric tags to confirm altered levels of hundreds of proteins from our metabolic labeling-  
364 based results. We did not reproduce the precise proteins and levels between the multiple  
365 datasets but the overall patterns and trends between the two strategies are in agreement.  
366 Similar to any other high throughput analysis method, MS has intrinsic technical challenges  
367 and biases. Confounding factors include biological sources such as animal to animal  
368 variation, experimental variations during sample processing, technical differences (63), and

369 differences in the bioinformatic analysis. Altogether, these factors complicate our ability to  
370 directly compare global proteomic datasets.

371 We focused on noise exposures that induce “*auditory neuropathy*” which has been  
372 reported to deteriorate IHC synaptic compartments and produce functional decline based on  
373 ABR and DPOAE analyses (64). The criteria for synaptopathy-inducing TTS in a noise  
374 overstimulation model has been described in young adult mice (16 week, male CBA/CaJ)  
375 exposed to noise (8–16 kHz octave-band) at 100 dB SPL for 2 hours (10). However the  
376 pattern of hearing loss varies depending on differences in the age, sex, and strain of the  
377 mice (65, 66). While it is difficult to compare noise exposure between labs, due to variations  
378 according in the noise exposure chamber and loud speaker conditions, we show that  
379 neuropathy is also induced by shorter noise exposures and delineate conditions under which  
380 it occurs. More importantly, elucidation of the early protein biomarkers and substrates of  
381 different levels of noise exposure potentially provide new evidence regarding the molecular  
382 substrates of ANF afferent synapse damage.

383 We provide a pioneering proteomic description of both the acute response and  
384 recovery program after noise exposure causing TTS and PTS. More than 90% of the  
385 proteins quantified in the <sup>15</sup>N datasets were also measured with TMT. The number of  
386 significantly altered proteins at the recovery time point was marginally reduced compared to  
387 the acute response. The majority of quantified significant proteins had increased levels in the  
388 acute response and decreased during the two week recovery period. Exposure to noise  
389 causing TTS causes a less dramatic proteome remodeling compared to PTS. Interestingly,  
390 there are a group of proteins with lowered levels immediately after noise but have increased  
391 levels during recovery. For example, *Gstp1* and *Gstp2*, play an important role in  
392 detoxification by catalyzing the conjugation of hydrophobic and electrophilic biological  
393 molecules. An increase of glutathione related proteins levels correlates well with evidence in  
394 using glutathione to attenuate level of hearing deficit from noise exposure (67, 68). Analysis  
395 of the proteins involved in the recovery process after noise exposure highlighted several  
396 potential mitigators of noise-induced stress such as, *Hcls1*, *Park7* and *Gatm* (***SI Appendix***).

397 However, the vast majority of the proteins identified in the current investigation have never  
398 before been linked to acoustic injury. Therefore, future studies verifying their functional  
399 involvement in the regulation and prevention of the cochlear response to acoustic  
400 overstimulation are crucially important in providing new insights into the molecular basis of  
401 NIHL which will pave the path of therapeutic discovery in the near future.

402

### 403 **Acknowledgements**

404 We thank Kwang Pak and Ann Hickox for their assistance. This work was supported by  
405 NIDCD/NIH (R00 DC-013805 to J.N.S.), NU Knowles Hearing Center, and VA (BLS Grant  
406 BX001295 to A.F.R.).

407

### 408 **References**

- 409 1. Saunders GH & Griest SE (2009) Hearing loss in veterans and the need for hearing  
410 loss prevention programs. *Noise Health* 11(42):14-21.
- 411 2. Carter L, Williams W, Black D, & Bundy A (2014) The leisure-noise dilemma: hearing  
412 loss or hearsay? What does the literature tell us? *Ear Hear* 35(5):491-505.
- 413 3. Liberman MC & Dodds LW (1984) Single-neuron labeling and chronic cochlear  
414 pathology. III. Stereocilia damage and alterations of threshold tuning curves. *Hear*  
415 *Res* 16(1):55-74.
- 416 4. Le Prell CG, Yamashita D, Minami SB, Yamasoba T, & Miller JM (2007) Mechanisms of  
417 noise-induced hearing loss indicate multiple methods of prevention. *Hear Res* 226(1-  
418 2):22-43.
- 419 5. Maulucci G, *et al.* (2014) Time evolution of noise induced oxidation in outer hair  
420 cells: role of NAD(P)H and plasma membrane fluidity. *Biochim Biophys Acta*  
421 1840(7):2192-2202.
- 422 6. Lu J, *et al.* (2014) Antioxidants reduce cellular and functional changes induced by  
423 intense noise in the inner ear and cochlear nucleus. *J Assoc Res Otolaryngol*  
424 15(3):353-372.
- 425 7. Liberman MC (2016) Noise-Induced Hearing Loss: Permanent Versus Temporary  
426 Threshold Shifts and the Effects of Hair Cell Versus Neuronal Degeneration. *Adv Exp*  
427 *Med Biol* 875:1-7.
- 428 8. Kujawa SG & Liberman MC (2006) Acceleration of age-related hearing loss by early  
429 noise exposure: evidence of a misspent youth. *J Neurosci* 26(7):2115-2123.
- 430 9. Lin HW, Furman AC, Kujawa SG, & Liberman MC (2011) Primary neural degeneration  
431 in the Guinea pig cochlea after reversible noise-induced threshold shift. *J Assoc Res*  
432 *Otolaryngol* 12(5):605-616.

- 433 10. Kujawa SG & Liberman MC (2009) Adding insult to injury: cochlear nerve  
434 degeneration after "temporary" noise-induced hearing loss. *J Neurosci* 29(45):14077-  
435 14085.
- 436 11. Shi L, *et al.* (2016) Cochlear Synaptopathy and Noise-Induced Hidden Hearing Loss.  
437 *Neural Plast* 2016:6143164.
- 438 12. Robertson D (1983) Functional-Significance of Dendritic Swelling after Loud Sounds  
439 in the Guinea-Pig Cochlea. *Hearing Res* 9(3):263-278.
- 440 13. Liberman MC, Epstein MJ, Cleveland SS, Wang H, & Maison SF (2016) Toward a  
441 Differential Diagnosis of Hidden Hearing Loss in Humans. *PLoS One* 11(9):e0162726.
- 442 14. Ruel J, *et al.* (2007) Physiology, pharmacology and plasticity at the inner hair cell  
443 synaptic complex. *Hear Res* 227(1-2):19-27.
- 444 15. Wang Y, Hirose K, & Liberman MC (2002) Dynamics of noise-induced cellular injury  
445 and repair in the mouse cochlea. *J Assoc Res Otolaryngol* 3(3):248-268.
- 446 16. Kim DK, *et al.* (2014) Protective effect of unilateral and bilateral ear plugs on noise-  
447 induced hearing loss: functional and morphological evaluation in animal model.  
448 *Noise Health* 16(70):149-156.
- 449 17. Op de Beeck K, Schacht J, & Van Camp G (2011) Apoptosis in acquired and genetic  
450 hearing impairment: the programmed death of the hair cell. *Hear Res* 281(1-2):18-  
451 27.
- 452 18. Henderson D, Bielefeld EC, Harris KC, & Hu BH (2006) The role of oxidative stress in  
453 noise-induced hearing loss. *Ear Hear* 27(1):1-19.
- 454 19. Henderson D & Hamernik RP (1986) Impulse noise: critical review. *J Acoust Soc Am*  
455 80(2):569-584.
- 456 20. Hickox AE, *et al.* (2017) Global Analysis of Protein Expression of Inner Ear Hair Cells. *J*  
457 *Neurosci* 37(5):1320-1339.
- 458 21. Darville LN & Sokolowski BH (2013) In-depth proteomic analysis of mouse cochlear  
459 sensory epithelium by mass spectrometry. *J Proteome Res* 12(8):3620-3630.
- 460 22. Wang DL, Li H, Liang R, & Bao J (2015) Identification of multiple metabolic enzymes  
461 from mice cochleae tissue using a novel functional proteomics technology. *PLoS One*  
462 10(3):e0121826.
- 463 23. Maeda Y, Fukushima K, Kariya S, Orita Y, & Nishizaki K (2015) Dexamethasone  
464 Regulates Cochlear Expression of Deafness-associated Proteins Myelin Protein Zero  
465 and Heat Shock Protein 70, as Revealed by iTRAQ Proteomics. *Otol Neurotol*  
466 36(7):1255-1265.
- 467 24. Waissbluth S, Garnier D, Akinpelu OV, Salehi P, & Daniel SJ (2017) The impact of  
468 erdosteine on cisplatin-induced ototoxicity: a proteomics approach. *Eur Arch*  
469 *Otorhinolaryngol* 274(3):1365-1374.
- 470 25. Jamesdaniel S, *et al.* (2011) Noise induced changes in the expression of p38/MAPK  
471 signaling proteins in the sensory epithelium of the inner ear. *J Proteomics* 75(2):410-  
472 424.
- 473 26. Butko MT, *et al.* (2013) In vivo quantitative proteomics of somatosensory cortical  
474 synapses shows which protein levels are modulated by sensory deprivation. *Proc*  
475 *Natl Acad Sci U S A* 110(8):E726-735.
- 476 27. Washburn MP, Wolters D, & Yates JR, 3rd (2001) Large-scale analysis of the yeast  
477 proteome by multidimensional protein identification technology. *Nat Biotechnol*  
478 19(3):242-247.



- 479 28. MacCoss MJ, Wu CC, Liu H, Sadygov R, & Yates JR, 3rd (2003) A correlation algorithm  
480 for the automated quantitative analysis of shotgun proteomics data. *Anal Chem*  
481 75(24):6912-6921.
- 482 29. Thomas PD, *et al.* (2006) Applications for protein sequence-function evolution data:  
483 mRNA/protein expression analysis and coding SNP scoring tools. *Nucleic Acids Res*  
484 34(Web Server issue):W645-650.
- 485 30. Penke B, *et al.* (2018) Heat Shock Proteins and Autophagy Pathways in  
486 Neuroprotection: from Molecular Bases to Pharmacological Interventions. *Int J Mol*  
487 *Sci* 19(1).
- 488 31. Ting L, Rad R, Gygi SP, & Haas W (2011) MS3 eliminates ratio distortion in isobaric  
489 multiplexed quantitative proteomics. *Nat Methods* 8(11):937-940.
- 490 32. McAlister GC, *et al.* (2014) MultiNotch MS3 enables accurate, sensitive, and  
491 multiplexed detection of differential expression across cancer cell line proteomes.  
492 *Anal Chem* 86(14):7150-7158.
- 493 33. Tew KD, *et al.* (2011) The role of glutathione S-transferase P in signaling pathways  
494 and S-glutathionylation in cancer. *Free Radic Biol Med* 51(2):299-313.
- 495 34. Wang Y, *et al.* (2015) HAX-1 is overexpressed in hepatocellular carcinoma and  
496 promotes cell proliferation. *Int J Clin Exp Pathol* 8(7):8099-8106.
- 497 35. Mullett SJ, Di Maio R, Greenamyre JT, & Hinkle DA (2013) DJ-1 expression modulates  
498 astrocyte-mediated protection against neuronal oxidative stress. *J Mol Neurosci*  
499 49(3):507-511.
- 500 36. Sandell LL, Guan XJ, Ingram R, & Tilghman SM (2003) Gatm, a creatine synthesis  
501 enzyme, is imprinted in mouse placenta. *Proc Natl Acad Sci U S A* 100(8):4622-4627.
- 502 37. Cho Y, Gong TW, Kanicki A, Altschuler RA, & Lomax MI (2004) Noise overstimulation  
503 induces immediate early genes in the rat cochlea. *Brain Res Mol Brain Res* 130(1-  
504 2):134-148.
- 505 38. Kirkegaard M, *et al.* (2006) Differential gene expression in the rat cochlea after  
506 exposure to impulse noise. *Neuroscience* 142(2):425-435.
- 507 39. Hu BH, *et al.* (2009) Differential expression of apoptosis-related genes in the cochlea  
508 of noise-exposed rats. *Neuroscience* 161(3):915-925.
- 509 40. Anttonen T, *et al.* (2017) Cytoskeletal Stability in the Auditory Organ In Vivo: RhoA Is  
510 Dispensable for Wound Healing but Essential for Hair Cell Development. *eNeuro* 4(5).
- 511 41. Beisel KW & Kennedy JE (1994) Identification of novel alternatively spliced isoforms  
512 of the tropomyosin-encoding gene, TMnm, in the rat cochlea. *Gene* 143(2):251-256.
- 513 42. Anniko M, Arnold W, Stigbrand T, & Takumida M (1995) Cytoskeletal basis for  
514 contractility of outer hair cells in the normal adult human organ of Corti:  
515 comparisons with vestibular hair cells. *ORL J Otorhinolaryngol Relat Spec* 57(2):61-  
516 67.
- 517 43. Ivanov AI, McCall IC, Parkos CA, & Nusrat A (2004) Role for actin filament turnover  
518 and a myosin II motor in cytoskeleton-driven disassembly of the epithelial apical  
519 junctional complex. *Mol Biol Cell* 15(6):2639-2651.
- 520 44. Han Y, Wang X, Chen J, & Sha SH (2015) Noise-induced cochlear F-actin  
521 depolymerization is mediated via ROCK2/p-ERM signaling. *J Neurochem* 133(5):617-  
522 628.
- 523 45. Ori-McKenney KM, *et al.* (2016) Phosphorylation of beta-Tubulin by the Down  
524 Syndrome Kinase, Minibrain/DYRK1a, Regulates Microtubule Dynamics and Dendrite  
525 Morphogenesis. *Neuron* 90(3):551-563.

- 526 46. Yau KW, *et al.* (2016) Dendrites In Vitro and In Vivo Contain Microtubules of  
527 Opposite Polarity and Axon Formation Correlates with Uniform Plus-End-Out  
528 Microtubule Orientation. *J Neurosci* 36(4):1071-1085.
- 529 47. Wan G & Corfas G (2017) Transient auditory nerve demyelination as a new  
530 mechanism for hidden hearing loss. *Nat Commun* 8:14487.
- 531 48. Yoshida A, *et al.* (2012) Localization of septin proteins in the mouse cochlea. *Hear*  
532 *Res* 289(1-2):40-51.
- 533 49. Xie Y, *et al.* (2007) The GTP-binding protein Septin 7 is critical for dendrite branching  
534 and dendritic-spine morphology. *Curr Biol* 17(20):1746-1751.
- 535 50. Tada T, *et al.* (2007) Role of Septin cytoskeleton in spine morphogenesis and  
536 dendrite development in neurons. *Curr Biol* 17(20):1752-1758.
- 537 51. Hu J, *et al.* (2012) Septin-driven coordination of actin and microtubule remodeling  
538 regulates the collateral branching of axons. *Curr Biol* 22(12):1109-1115.
- 539 52. Shamir M, Bar-On Y, Phillips R, & Milo R (2016) SnapShot: Timescales in Cell Biology.  
540 *Cell* 164(6):1302-1302 e1301.
- 541 53. Gonskikh Y & Polacek N (2017) Alterations of the translation apparatus during aging  
542 and stress response. *Mech Ageing Dev* 168:30-36.
- 543 54. Myung J, Kim KB, & Crews CM (2001) The ubiquitin-proteasome pathway and  
544 proteasome inhibitors. *Med Res Rev* 21(4):245-273.
- 545 55. Finley D (2009) Recognition and processing of ubiquitin-protein conjugates by the  
546 proteasome. *Annu Rev Biochem* 78:477-513.
- 547 56. Dudek EJ, *et al.* (2005) Selectivity of the ubiquitin pathway for oxidatively modified  
548 proteins: relevance to protein precipitation diseases. *FASEB J* 19(12):1707-1709.
- 549 57. Lim HH, Jenkins OH, Myers MW, Miller JM, & Altschuler RA (1993) Detection of HSP  
550 72 synthesis after acoustic overstimulation in rat cochlea. *Hear Res* 69(1-2):146-150.
- 551 58. Yoshida N, Kristiansen A, & Liberman MC (1999) Heat stress and protection from  
552 permanent acoustic injury in mice. *J Neurosci* 19(22):10116-10124.
- 553 59. Muller F (2000) The nature and mechanism of superoxide production by the electron  
554 transport chain: Its relevance to aging. *J Am Aging Assoc* 23(4):227-253.
- 555 60. Zhang G, Fenyo D, & Neubert TA (2009) Evaluation of the variation in sample  
556 preparation for comparative proteomics using stable isotope labeling by amino acids  
557 in cell culture. *J Proteome Res* 8(3):1285-1292.
- 558 61. Gouw JW, Krijgsveld J, & Heck AJ (2010) Quantitative proteomics by metabolic  
559 labeling of model organisms. *Mol Cell Proteomics* 9(1):11-24.
- 560 62. Frost DC & Li L (2016) High-Throughput Quantitative Proteomics Enabled by Mass  
561 Defect-Based 12-Plex DiLeu Isobaric Tags. *Methods Mol Biol* 1410:169-194.
- 562 63. Rauniyar N & Yates JR, 3rd (2014) Isobaric labeling-based relative quantification in  
563 shotgun proteomics. *J Proteome Res* 13(12):5293-5309.
- 564 64. Paquette ST, Gilels F, & White PM (2016) Noise exposure modulates cochlear inner  
565 hair cell ribbon volumes, correlating with changes in auditory measures in the FVB/nj  
566 mouse. *Sci Rep* 6:25056.
- 567 65. Ohlemiller KK, Jones SM, & Johnson KR (2016) Application of Mouse Models to  
568 Research in Hearing and Balance. *J Assoc Res Otolaryngol* 17(6):493-523.
- 569 66. Ohlemiller KK, Kaur T, Warchol ME, & Withnell RH (2018) The endocochlear potential  
570 as an indicator of reticular lamina integrity after noise exposure in mice. *Hear Res*  
571 361:138-151.

- 572 67. Yamasoba T, Nuttall AL, Harris C, Raphael Y, & Miller JM (1998) Role of glutathione in  
 573 protection against noise-induced hearing loss. *Brain Res* 784(1-2):82-90.  
 574 68. Ohinata Y, Yamasoba T, Schacht J, & Miller JM (2000) Glutathione limits noise-  
 575 induced hearing loss. *Hear Res* 146(1-2):28-34.  
 576

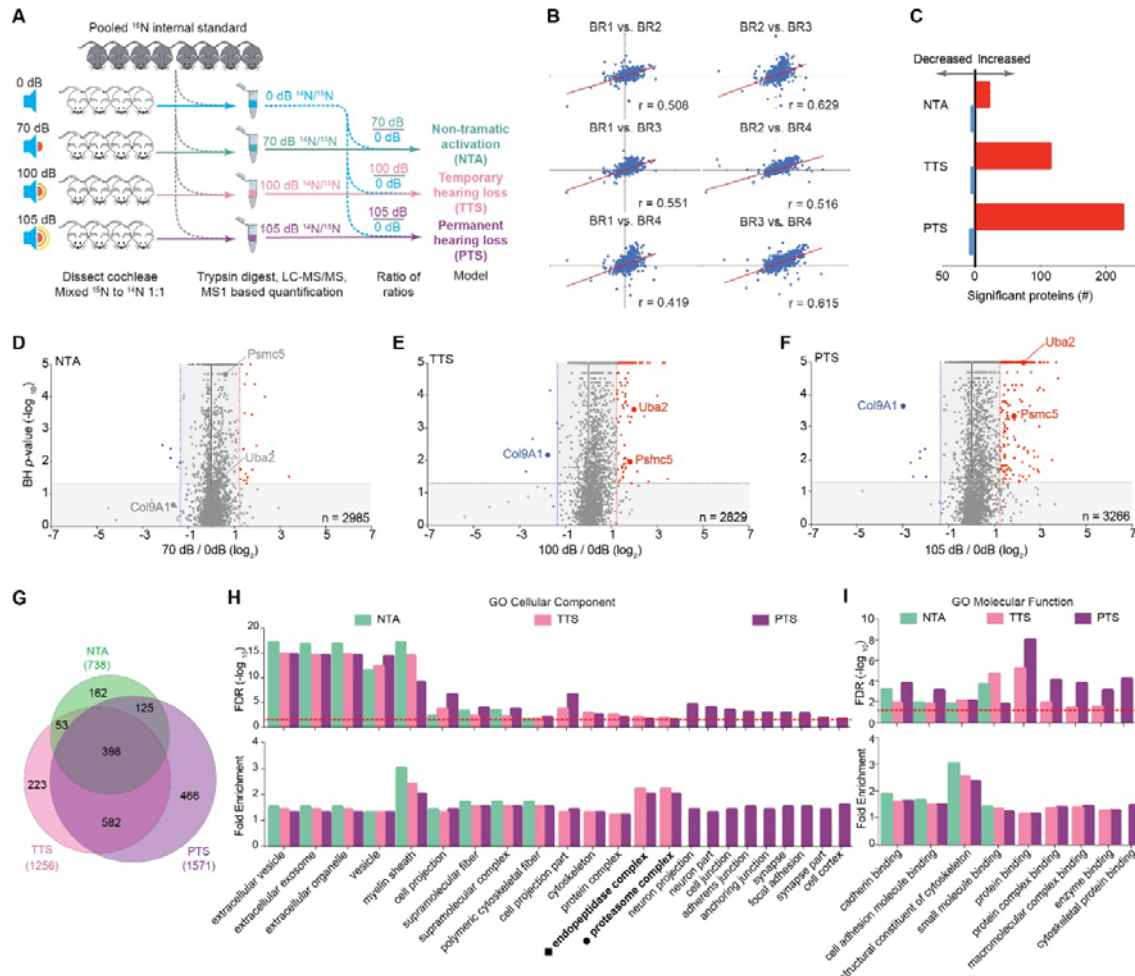

577

578 **Fig. 1** Metabolic stable isotope labeling with MS-based proteomic quantification across noise  
 579 exposure conditions. (A) Experimental scheme for quantifying proteins in different levels of  
 580 noise exposed cochleae by LC MS/MS using  $^{15}\text{N}$  labeled cochleae (gray) as an internal  
 581 standard. (B) Correlation plots from pairs of the 4 biological replicates in 0 dB condition were  
 582 used to verify the level of threshold log fold differences (TLFD) to determine regulated  
 583 protein expression. (C) Summary of total number of significantly quantified proteins which  
 584 satisfied TLFD criteria. (D-F) Volcano plots of the quantified proteins from acoustic  
 585 overexposed cochleae by LC-MS/MS, graphed as  $\text{Log}_2$  fold change vs.  $-\text{Log}_{10} P$  value.

586 Proteins that satisfied both the statistical cutoff ( $P < 0.05$ ) and TLFD are shown in red or  
587 blue points represent up- or down-regulated proteins, respectively. (G) Venn diagram of the  
588 significantly altered proteins across all three levels of exposure. (H) Enrichment analysis of  
589 significant quantified proteins based on GO:Cellular component and, (I) GO: Molecular  
590 function terms.

591

592

593

594

595

596

597

598

599

600

601

602

603

604

605

606

607



609 **Fig. 2** Noise dependent trends of significantly altered proteins across conditions. (A)  
610 Significant proteins quantified across NTA, TTS and PTS conditions. A majority of these  
611 overlapping proteins had increased levels in a noise intensity dependent manner. This  
612 phenomena was also observed in groups of proteins measured only in two of the conditions  
613 (B) PTS:TTS, (C) PTS:NTA and (D) TTS:NTA. Accumulation of Log<sub>2</sub> fold change level are  
614 presented in the graph together with protein name and the protein function based on GO  
615 classification (● = Proteasome complex, ▲ = Protein folding and ■ = Proteolysis).

616

617

618

619

620

621

622

623

624

625

626

627

628

629

630

631

632

633

634

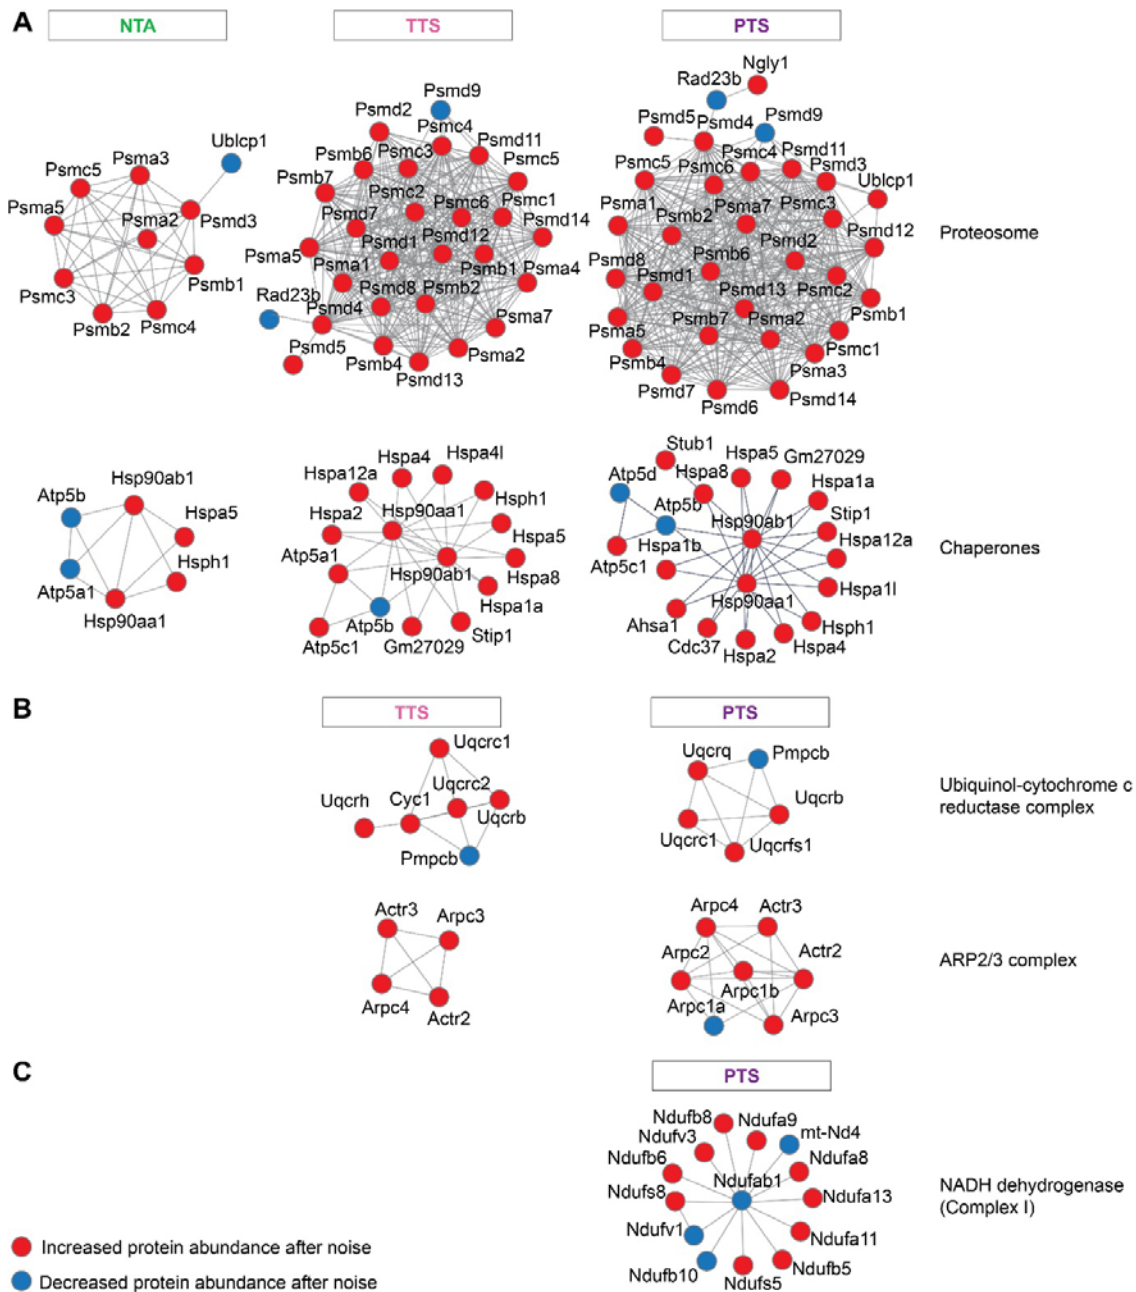

635

636

637

638

639

640

641

642

**Fig. 3** Protein-protein interactions analysis by STRING are represented in five major groups of enzymatic pathways and protein complexes in response to noise stimulation. (A) Ubiquitin-proteasome system (UPS) and heat shock protein (HSP) chaperons are the most abundant protein interactions, which also show increased numbers according to the intensity of noise. (B) Mitochondrial electron transport complex III enzymes and actin cytoskeletal regulator protein complex ARP2/3 are also shown to increase their ramification in response to higher noise level at TTS and PTS. (C) Mitochondrial NADH dehydrogenase (complex I)

643 proteins typically found only in PTS condition which may indicate potentially distinct protein

644 mechanisms for permanent hearing loss.

645

646

647

648

649

650

651

652

653

654

655

656

657

658

659

660

661

662

663

664

665

666

667

668

669

670



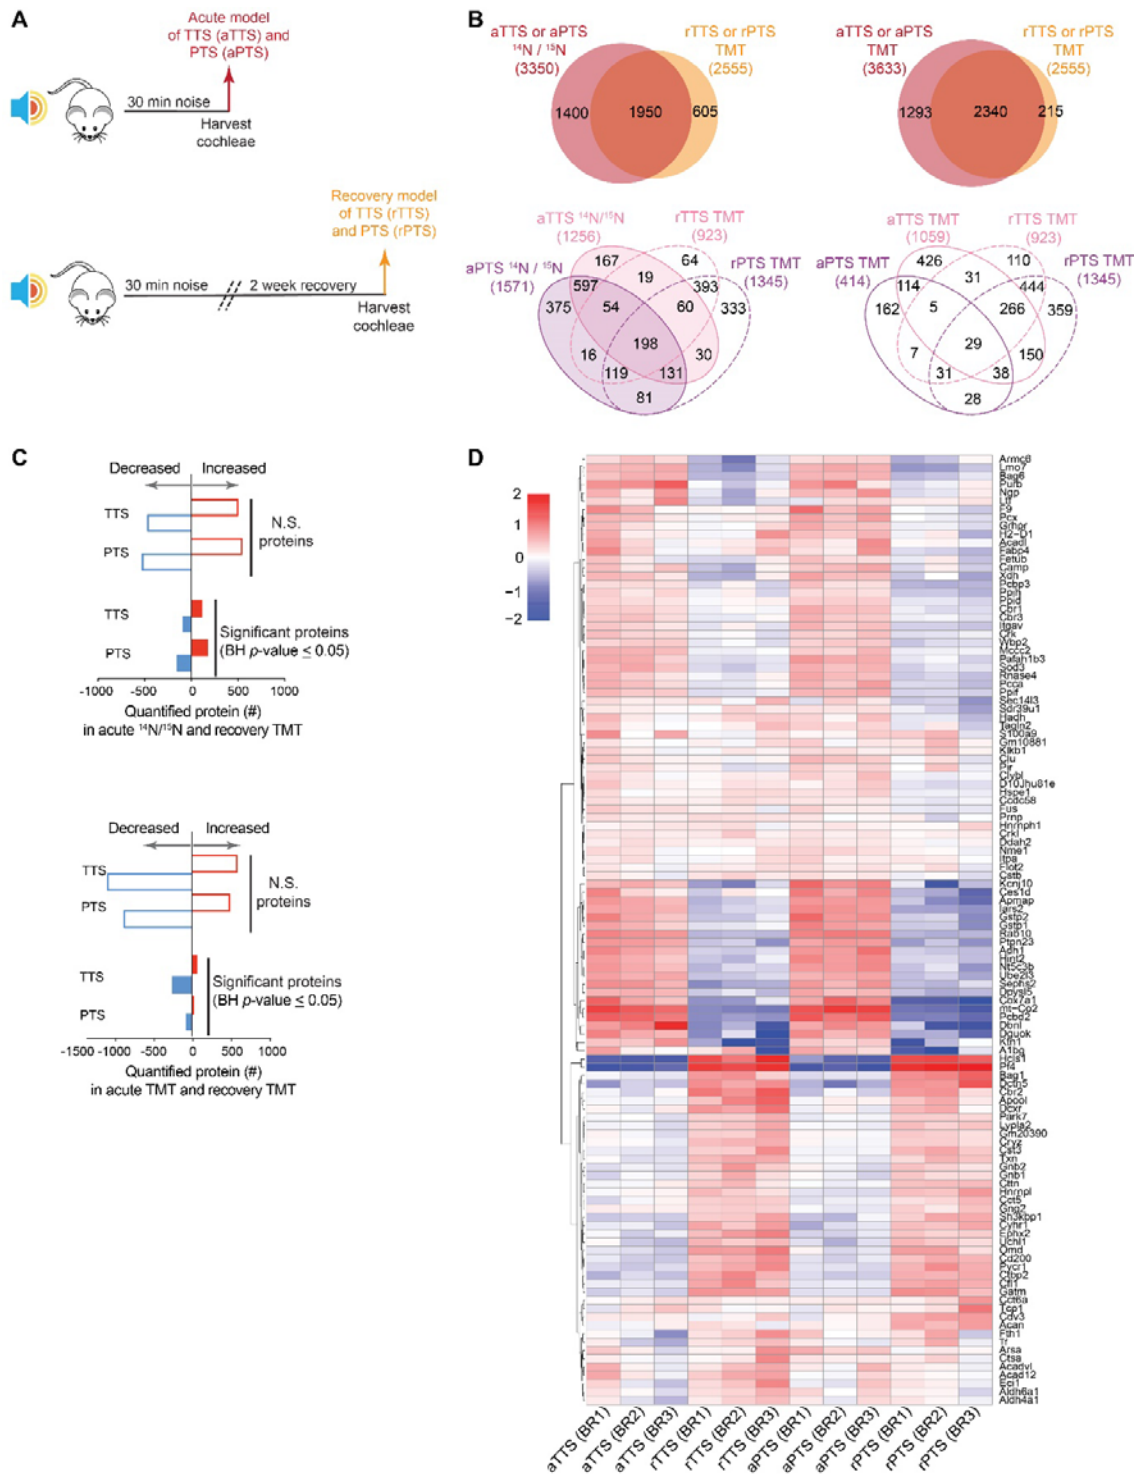

671

672 **Fig. 4** Quantitative analysis of the cochlear proteome after two weeks of recovery. (A)

673 Experimental scheme for identifying and quantifying proteins in acute (aTTS, aPTS) or

674 recovery (rTTS, rPTS) time points after 30 min of noise exposure. (B) Venn diagram

675 showing common proteins measured in TTS and PTS conditions. (C) Number of quantified

676 and significant protein verified according to their increase or decrease level of expression.

677 (D) Heat map of significant protein across TTS and PTS conditions in acute and recovery

678 time points.
